# Supplementary material for: Machine Learning for the Design and Development of Biofilm Regulators
Source: Preprints.org preprint supplement (doi:10.20944/preprints201803.0118.v1), 2018-03-15
Supplement: Supplementary file 1 [file supplementary]

```
library(caret)

library(ggplot2)

set1 <- read.csv("/Users/Ben/Desktop/Academic/QSAR PROJECT/R/set5/ILDesc.csv", stringsAsFactors =
TRUE)

nzv <- nearZeroVar(set1)

set2 <- set1[, -nzv]


#Seperate by molecule class, training and testing

Indoles <- subset(set2, nO < 3)

Lactones <- subset(set2, nO > 2)


set.seed(859)

IndexI <- createDataPartition(Indoles$VAR001, p=.7, list = F)

IndexL <- createDataPartition(Lactones$VAR001, p=.7, list = F)

trainIndoles <- Indoles[IndexI, ]

testingIndoles <- Indoles[-IndexI, ]

trainlactones <- Lactones[IndexL, ]

testinglactones <- Lactones[-IndexL, ]

Indoles

#Use RFE to find selected descriptors

k <- ncol(trainIndoles)

k1 <- ncol(trainlactones)

DescI <- na.omit(trainIndoles[,-k])

BindingI <- na.omit(trainIndoles[,k])

DescL <- na.omit(trainlactones[,-k1])

BindingL <- na.omit(trainlactones[,k1])

numdesc <- 25

controlI <- rfeControl(functions=rffuncs, method="cv", number = 10, repeats = 10)
```

```
controlL <- rfeControl(functions=rfFuncs, method="cv", number = 7, repeats = 10)
```

```
resultsI <- rfe(DescI, BindingI, sizes = numdesc, rfeControl=controlI)
```

```
resultsL <- rfe(DescL, BindingL, sizes = numdesc, rfeControl=controlL)
```

```
resultsI
```

```
resultsL
```

```
size = c(25,50,100,500,1000,2000)
```

```
resultsI <- rfe(DescI, BindingI, sizes = size, rfeControl=control)
```

```
resultsL <- rfe(DescL, BindingL, sizes = size, rfeControl=control)
```

```
ggplot(resultsI) + xlim(c(0, 2000)) + theme(text = element_text(size=20))
```

```
ggplot(resultsL) + xlim(c(0, 2000)) + theme(text = element_text(size=20))
```

```
coll <- c(names(resultsI$fit$forest$xlevels))
```

```
colL <- c(names(resultsL$fit$forest$xlevels))
```

```
trainI <- droplevels(trainIndoles[,c(coll,"VAR001")])
```

```
trainL <- droplevels(trainLactones[,c(colL,"VAR001")])
```

```
#brnns
```

```
controlI <- trainControl(method = "cv", number = 5, returnResamp = "final", search = "random")
```

```
controlL <- trainControl(method = "cv", number = 3, returnResamp = "final", search = "random")
```

```
metric <- "RMSE"
```

```
modell <- train(VAR001~., data = trainI, method = "brnn", tuneLength = 1, trControl = controlI, verbose  
=FALSE)
```

```
modellL <- train(VAR001~., data = trainL, method = "brnn", tuneLength = 1, trControl = controlL, verbose  
=FALSE)
```

```
modell
```

```
modellL
```

```

#predicted vs test set

predTestI <- predict(modell, newdata = testingIndoles[,-k])
realTestI <- testingIndoles[,k]

RMSE<-caret::RMSE(predTestI,realTestI)

R2<-caret::R2(predTestI,realTestI)

print(R2)

print(RMSE)

ggplot(mapping = aes(x = predTestI,y = realTestI)) +          #pred vs test set
  geom_point() +
  theme(text = element_text(size=20)) +
  scale_x_continuous(name = "binding affinity predicted by caret") +
  scale_y_continuous(name = "binding affinity predicted by autodock") +
  geom_smooth(method = "lm", se= FALSE, color="black", aes(group=1)) +
  annotate("rect", xmin = -9.5, xmax = -10.4, ymin = -8.5, ymax = -8.85, fill="white", colour="red") +
  annotate("text", x=-10, y=-8.6, label = "R^2 == 0.875", parse=T) +
  annotate("text", x=-10, y=-8.75, label = "RMSE == 0.495", parse=T)

```

```

predTestL <- predict.train(modell, newdata = testinglactones[,-k])
realTestL <- testinglactones[,k]

RMSE<-caret::RMSE(predTestL,realTestL)

R2<-caret::R2(predTestL,realTestL)

print(R2)

print(RMSE)

ggplot(mapping = aes(x = predTestL,y = realTestL)) +          #pred vs test set
  geom_point() +
  theme(text = element_text(size=20)) +
  scale_x_continuous(name = "binding affinity predicted by caret") +
  scale_y_continuous(name = "binding affinity predicted by autodock") +
  geom_smooth(method = "lm", se= FALSE, color="black", aes(group=1)) +

```

```

annotate("rect", xmin = -9.33, xmax = -9.08, ymin = -8.73, ymax = -8.83, fill="white", colour="red") +
annotate("text", x=-9.2, y=-8.75, label = "R^2 == 0.873", parse=T) +
annotate("text", x=-9.2, y=-8.8, label = "RMSE == 0.189", parse=T)

```

#Predicted vs for all set

```
predTestI <- predict.train(modell, newdata = Indoles[,-k])
```

```
realTestI <- Indoles[,k]
```

```
ggplot(mapping = aes(x = predTestI,y = realTestI)) +          #pred vs test set
```

```
  geom_point() +
```

```
  geom_smooth(method = "lm", se= TRUE, color="black", aes(group=1))
```

```
predTestL <- predict.train(modell, newdata = Lactones[,-k])
```

```
realTestL <- Lactones[,k]
```

```
ggplot(mapping = aes(x = predTestL,y = realTestL)) +          #pred vs test set
```

```
  geom_point() +
```

```
  geom_smooth(method = "lm", se= TRUE, color="black", aes(group=1))
```

```
predTest <- c(predTestI,predTestL)
```

```
realTest <- c(realTestI,realTestL)
```

```
RMSE<-caret::RMSE(predTest,realTest)
```

```
R2<-caret::R2(predTest,realTest)
```

```
print(R2)
```

```
print(RMSE)
```

```
ggplot() +
```

```
  theme(text = element_text(size=20)) +
```

```
  geom_point(mapping = aes(x = predTestI,y = realTestI, colour = 'blue')) +
```

```
  geom_point(mapping = aes(x = predTestL,y = realTestL, colour = 'red')) +
```

```
  scale_x_continuous(name = "binding affinity predicted by caret") +
```

```
  scale_y_continuous(name = "binding affinity predicted by autodock") +
```

```
  scale_color_manual(labels = c("Indoles", "Lactones"), values = c("blue", "red")) +
```

```

geom_smooth(method = "lm", se= TRUE, color="black", aes(x = predTest,y = realTest)) +
annotate("rect", xmin = -9.9, xmax = -11.1, ymin = -8.1, ymax = -8.7, fill="white", colour="red") +
annotate("text", x=-10.5, y=-8.3, label = "R^2 == 0.961", parse=T) +
annotate("text", x=-10.5, y=-8.5, label = "RMSE == 0.211", parse=T) +
guides(fill=guide_legend(title="New Legend Title")) +
theme(legend.title = element_blank())

```

#model type for accuracy

```

coll <- c(names(resultsI$fit$forest$xlevels))
trainI <- droplevels(trainIndoles[,c(coll,"VAR001")])
IGrid <- expand.grid(.size=c(numdescl), .decay=c(1))
bcontrol <- trainControl(method = "cv", number = 3, returnResamp = "final", search = "random")
metric <- "RMSE"
modellnn <- train(VAR001~. , data = trainI, method = "nnet",trControl = bcontrol,
                 tuneGrid = IGrid, maxit = 1000, trace = F, linout = TRUE, MaxNWts = 1200)
modellbrnn <- train(VAR001~., data = trainI, method = "brnn", tuneLength = 2,trControl = bcontrol,
                  verbose =FALSE)
modellrf <- train(VAR001~., data=trainI, method="rf", metric=metric, trControl=bcontrol)
modellsvm <- train(VAR001~., data=trainI, method="svmRadial", metric=metric, trControl=bcontrol)
resultsI <- resamples(list(nn = modellnn,brnn = modellbrnn, svm=modellsvm, rf=modellrf))
summary(resultsI)
bwplot(resultsI)

```

```

coll <- c(names(resultsL$fit$forest$xlevels))
trainL <- droplevels(trainlactones[,c(coll,"VAR001")])
LGrid <- expand.grid(.size=c(numdescl), .decay=c(0.1))
bcontrol <- trainControl(method = "cv", number = 3, returnResamp = "final", search = "random")
metric <- "RMSE"
modellnn <- train(VAR001~. , data = trainL, method = "nnet",trControl = bcontrol,

```

```

tuneGrid = IGrid, maxit = 1000, trace = F, linout = TRUE, MaxNWts = 1200)

modellbrnn <- train(VAR001~., data = trainL, method = "brnn", tuneLength = 2, trControl = bcontrol,
verbose = FALSE)

modellrf <- train(VAR001~., data=trainL, method="rf", metric=metric, trControl=bcontrol)

modellsvm <- train(VAR001~., data=trainL, method="svmRadial", metric=metric, trControl=bcontrol)

resultsL <- resamples(list(nn = modelLnn, brnn = modellbrnn, svm=modelLsvm, rf=modelLrf))

summary(resultsL)

bwplot(resultsL)

#number of descriptors for accuracy

descResults <- data.frame(matrix(nrow = 50, ncol = 2))

trials <- c(10:50)

for (i in trials){
  numdesc <- i
  descResults[i,1] <- i
  controll <- rfeControl(functions=rfFuncs, method="cv", number = 10, repeats = 3)
  resultsl <- rfe(Descl, Bindingl, sizes = numdescl, rfeControl=controll)
  coll <- c(names(resultsl$fit$forest$xlevels))
  trainl <- droplevels(trainIndoles[,c(coll,"VAR001")])
  controlL <- trainControl(method = "cv", number = 3, returnResamp = "final", search = "random")
  metric <- "RMSE"

  modell <- train(VAR001~., data = trainl, method = "brnn", tuneLength = 1, trControl = controlL, verbose
=FALSE)

  descResults[i,2] <- modell$results$Rsquared

  print(i)
}

ggplot(mapping = aes ( x = descResults[,1], y = descResults[,2])) +
  geom_point() +
  geom_smooth()

```

```
#descriptor matches

control <- trainControl(method="repeatedcv", number=10, repeats=3, search="grid")
tunegrid <- expand.grid(.mtry=c(sqrt(ncol(x))))
modellist <- list()
for (ntree in c(100, 150, 200, 250)) {
  set.seed(seed)

  fit <- train(Class~., data=dataset, method="rf", metric=metric, tuneGrid=tunegrid, trControl=control,
ntree=ntree)

  key <- toString(ntree)
  modellist[[key]] <- fit
}

Indy <- c(str(trainI))
Lacty <- c(str(trainL))
pmatch(Indy, Lacty)
```
